# Supplementary material
Source: PubMed Central journal article supplement (PMC5823978)
Supplement: NIHMS943448-supplement-Supp.pdf [file NIHMS943448-supplement-Supp.pdf]

## Supplementary Online Content

Armangué T, Sabater L, Torres-Vega E, et al. Clinical and immunological features of opsoclonus-myoclonus syndrome in the era of neuronal cell surface antibodies. *JAMA Neurol*. Published online February 8, 2016. doi:10.1001/jamaneurol.2015.4607.

**eAppendix.** Supplemental methods

### eReferences

**eTable 1.** Univariate analysis for factors associated with bad outcome (mRS >2) at last follow up

**eTable 2.** Antibodies reported in adult patients with OMS

**eFigure.** Peptide sequences corresponding to GluR2 of AMPA receptor immunoprecipitated by the CSF of patients with IgM immunoreactivity against NHK-1

This supplementary material has been provided by the authors to give readers additional information about their work.

## **eAppendix. Supplemental methods**

### Detection of neuronal antibodies against known paraneoplastic or cell surface antigens

All serum and CSF samples (70 paired samples; 39 sera, and 5 CSF) were examined for the presence of onconeural (Hu, Yo, Ri, CRMP5, amphiphysin, Ma2, Tr), GAD, and neuropil antibodies (NMDAR, AMPAR, GABA<sub>B</sub>R, CASPR2, LGI1, DPPX, mGluR1, and mGluR5) using immunohistochemistry on frozen sections of paraformaldehyde-perfused or post-fixed rat brain, as reported.<sup>1,2</sup> Samples showing tissue immunoreactivity were further examined with immunoblot (Euroimmun, Lübeck, Germany) or cell based assays using HEK293 cells transfected with the appropriate plasmids.<sup>3</sup> All samples were examined for GlyR and GABA<sub>A</sub>R antibodies using live cell-based assays with the  $\alpha 1$  subunit of the GlyR (serum diluted from 1:80, CSF 1:5) and the  $\alpha 1/\beta 3$  subunits of the GABA<sub>A</sub>R (serum diluted from 1:40, CSF 1:5) as reported.<sup>4,5</sup>

### Screening for new antibodies against surface antigens

All samples were examined for IgG and IgM antibodies to unknown cell surface antigens by immunohistochemistry on post-fixed rat brain and immunofluorescence on live cultured rat hippocampal neurons. These experiments and immunoprecipitation assays were done as described (see below).<sup>3,6</sup>

### Immunohistochemistry on post-fixed rat brain

Female Wistar rats were euthanized and the brain was removed, sagittally sectioned, immersed in 4% paraformaldehyde at 4°C for 1 hour, cryoprotected with 40% sucrose for 24 hours, and snap frozen in chilled isopentane. Immunohistochemistry using a standard avidin-biotin

peroxidase method was applied using patients' serum (diluted 1:200) or CSF (1:5), followed by the appropriate biotinylated secondary goat anti-human IgG antibodies (at dilution 1:2000) (Vector Labs, Burlingame, CA, USA) or goat anti-human IgM (at dilution 1:1000) (Southern Biotechnology, Birmingham, AL, USA) and the Vectastain Elite ABC complex (Vector Labs, USA) for 40 min. The reaction was developed with 0.05% diaminobenzidine with 0.01% hydrogen peroxide in phosphate-buffered saline (PBS) with 0.5% Triton X-100.<sup>2</sup>

#### Immunofluorescence on live cultured rat hippocampal

Rat hippocampal neuronal cultures were prepared as reported.<sup>7</sup> Fourteen days live neurons grown on coverslips were treated for 1 hour at 37° C with patients' or control serum (final dilution 1:200) or CSF (1:5). After removing the media and extensive washing with PBS, neurons were fixed with 4% PFA, and incubated with anti-human IgG or IgM (diluted 1:1000) Alexa Fluor secondary antibody (Molecular Probes, OR). Results were photographed under a fluorescence microscope using Zeiss Axiovision software (Zeiss, Thornwood, NY).<sup>6</sup>

#### Immunoprecipitation assays

Immunoprecipitation experiments were done with cultures of rat hippocampal neurons grown in 100mm wells, and incubated at 37°C with patients' CSF or serum (diluted 1:100) for 1 hour. Neurons were then washed with PBS, lysed with buffer containing protease inhibitors (P8340; Sigma Labs, St. Louis, MO, USA), and centrifuged at 16,000 g for 20 minutes at 4°C. The supernatant was retained, incubated with protein A/G agarose beads (20423; Pierce, Rockford, IL) overnight at 4°C, and centrifuged. To immunoprecipitate IgM antibodies, the protein A/G beads were coated with an IgG goat antibody against human IgM (1020-01; Southern Biotech, Birmingham, AL, USA). The pellet was resuspended in Laemmli buffer,

boiled for 10 minutes, separated in a 10% sodium dodecyl sulphate polyacrylamide gel electrophoresis, and the proteins visualized with EZBlue gel staining (G1041; Sigma Labs). Because the EZBlue gel staining did not identify specific protein bands, gels were cut into ten slices and sent for mass spectrometry to the Proteomics Core Facility at the University of Pennsylvania. Protein bands were trypsin digested and analyzed with a nano liquid chromatography (nano LC)/ nanospray/ linear ion trap (LTQ) mass spectrometer (Thermo Electron Corporation, San Jose, CA) as reported.<sup>8</sup> The Xcalibur software (Thermo Scientific, Waltham, MA) was utilized to acquire the raw data and Sequest program (ThermoFinnigan, San Jose, CA; version SRF v. 5) to match the results with the UniProtKB/Swiss-Prot protein sequence database. The Scaffold 3.3 program was used to analyze the files generated. Protein identifications were accepted if they could be established at greater than 95.0% probability and contained at least three identified peptides. The specificity of the results was confirmed by western blot and specific primary antibodies: mouse monoclonal anti-HNK-1 (Sigma Aldrich, St. Louis, MO, USA) and anti-GluR2/3 (AMPA subunits, Millipore, Billerica, MA, USA).

#### Analysis of IgM immunoreactivity in CSF of patients with OMS and lung cancer

To characterize the CSF IgM immunoreactivity of OMS patients on brain immunohistochemistry, a protein extract from human brain myelin prepared as described,<sup>9</sup> was separated in a sodium dodecyl sulfate polyacrylamide gel electrophoresis as described, transferred to immobilon-P membrane (Millipore IPVH00010) and incubated with an IgM monoclonal antibody against HNK-1 (Sigma-Aldrich, St. Louis, MO, USA), a serum positive for IgM MAG antibodies, and the three CSF from the OMS patients that showed the IgM immunoreactivity in brain immunohistochemistry. The reactivity was developed using the

appropriate biotinylated secondary antibodies (1:1000) and the avidin-biotin peroxidase and diaminobenzidine method.

To confirm that the IgM immunoreactivity of OMS patients colocalize with the HNK-1 epitope in vivo, live hippocampal neurons were incubated with the CSF showing the IgM immunoreactivity and the monoclonal antibody against HNK-1 and analyzed by immunofluorescence as described above. Colocalization analysis was done with Imaris 7.6 software (Bitplane AG, Zurich).

## eReferences

1. Graus F, Dalmau J, Valldeoriola F, et al. Immunological characterization of a neuronal antibody (anti-Tr) associated with paraneoplastic cerebellar degeneration and Hodgkin's disease. *J Neuroimmunol* 1997;74:55-61.
2. Ances BM, Vitaliani R, Taylor RA, Liebeskind DS, Voloschin A, Houghton DJ, et al. Treatment-responsive limbic encephalitis identified by neuropil antibodies: MRI and PET correlates. *Brain* 2005;128:1764-77.
3. Dalmau J, Lancaster E, Martinez-Hernandez E, Rosenfeld MR, Balice-Gordon R. Clinical experience and laboratory investigations in patients with anti-NMDAR encephalitis. *Lancet Neurol* 2011;10:63-74.
4. Martinez-Hernandez E, Sepulveda M, Rostasy K, et al. Antibodies to aquaporin 4, myelin-oligodendrocyte glycoprotein, and the glycine receptor alpha1 subunit in patients with isolated optic neuritis. *JAMA Neurol* 2015;72:187-193.
5. Petit-Pedrol M, Armangue T, Peng X, et al. Encephalitis with refractory seizures, status epilepticus, and antibodies to the GABAA receptor: a case series, characterisation of the antigen, and analysis of the effects of antibodies. *Lancet Neurol* 2014;13:276-286.
6. Lancaster E, Lai M, Peng X, et al. Antibodies to the GABA(B) receptor in limbic encephalitis with seizures: case series and characterisation of the antigen. *Lancet Neurol*. 2010;9:67-76.
7. Buchhalter JR, Dichter MA. Electrophysiological comparison of pyramidal and stellate nonpyramidal neurons in dissociated cell culture of rat hippocampus. *Brain Res Bull* 1991;26:333-8.
8. Strader MB, Tabb DL, Hervey WJ, Pan C, Hurst GB. Efficient and specific trypsin digestion of microgram to nanogram quantities of proteins in organic-aqueous solvent systems. *Anal Chem*. 2006;78:125-34.
9. Quarles RH, Pasnak CF. A rapid procedure for selectively isolating the major glycoprotein from purified rat brain myelin. *Biochem J*. 1977;163:635-7.
10. Luque FA, Furneaux HM, Ferziger R, et al. Anti-Ri: an antibody associated with paraneoplastic opsoclonus and breast cancer. *Ann Neurol* 1991;29:241-251.
11. Hersh B, Dalmau J, Dangond F, Gultekin S, Geller E, Wen PY. Paraneoplastic opsoclonus-myoclonus associated with anti-Hu antibody. *Neurology* 1994;44:1754-5.
12. Arino H, Hofberger R, Gresa-Arribas N, et al. Paraneoplastic Neurological Syndromes and Glutamic Acid Decarboxylase Antibodies. *JAMA Neurol* 2015;72:874-881.
13. Markakis I, Alexiou E, Xifaras M, Gekas G, Rombos A. Opsoclonus-myoclonus-ataxia syndrome with autoantibodies to glutamic acid decarboxylase. *Clin Neurol Neurosurg* 2008;110:619-621.
14. Bhandari HS. Presentation of opsoclonus myoclonus ataxia syndrome with glutamic acid decarboxylase antibodies. *BMJ Case Rep* 2012;2012.
15. Bataller L, Rosenfeld MR, Graus F, Vilchez JJ, Cheung NK, Dalmau J. Autoantigen diversity in the opsoclonus-myoclonus syndrome. *Ann Neurol* 2003;53:347-353.

16. Candler PM, Dale RC, Griffin S, et al. Post-streptococcal opsoclonus-myoclonus syndrome associated with anti-neuroleukin antibodies. *J Neurol Neurosurg Psychiatry* 2006;77:507-512.
17. Zaro-Weber O, Galldiks N, Dohmen C, Fink GR, Nowak DA. Ocular flutter, generalized myoclonus, and trunk ataxia associated with anti-GQ1b antibodies. *Arch Neurol* 2008;65:659-661.
18. Morales-Briceno H, Rodriguez-Violante M, Cervantes-Arriaga A, Irani SR, Lees AJ, Silveira-Moriyama L. Opsoclonus myoclonus syndrome associated with GQ1b antibodies. *Mov Disord* 2012;27:1615-1616.
19. Smith JH, Dhamija R, Moseley BD, et al. N-methyl-D-aspartate receptor autoimmune encephalitis presenting with opsoclonus-myoclonus: treatment response to plasmapheresis. *Arch Neurol* 2011;68:1069-1072.
20. Kurian M, Lalive PH, Dalmau JO, Horvath J. Opsoclonus-myoclonus syndrome in anti-N-methyl-D-aspartate receptor encephalitis. *Arch Neurol* 2010;67:118-121.
21. DeFelipe-Mimbrera A, Masjuan J, Corral I, Villar LM, Graus F, Garcia-Barragan N. Opsoclonus-myoclonus syndrome and limbic encephalitis associated with GABAB receptor antibodies in CSF. *J Neuroimmunol* 2014;272:91-93.

**eTable 1. Univariate analysis for factors associated with bad outcome (mRS >2) at last follow up**

| <b>Factor</b>                                     | <b>p</b>  | <b>OR</b> | <b>95% CI</b> |
|---------------------------------------------------|-----------|-----------|---------------|
| Age Over 40                                       | 0.002*    | 6.8       | 2.1-22.2      |
| Gender                                            | 0.219     | 1.8       | 0.7-4.4       |
| Paraneoplastic                                    | <0.001*   | 7.9       | 2.8-22.3      |
| Tumor Type                                        | <0.001*   |           |               |
| No Tumor                                          | Reference |           |               |
| Lung cancer                                       | <0.001    | 16.7      | 4.2-66.6      |
| Breast cancer                                     | 0.027     | 6.9       | 1.3-37.6      |
| Teratoma                                          | 0.179     | 3.1       | 0.6-16.0      |
| Other tumor                                       | 0.660     | 1.7       | 0.2-19.0      |
| Prodromal Symptoms                                | 0.361     | 0.6       | 0.7-1.9       |
| Encephalopathy <sup>+</sup>                       | 0.062*    | 2.7       | 1.0-7.4       |
| Abnormal cranial nerves                           | 0.232     | 2.4       | 0.6-9.5       |
| Onconeural antibodies                             | 0.008*    | 18.2      | 2.1-154.3     |
| Neuronal surface antibodies <sup>&amp;</sup>      | 0.048*    | 3.2       | 1.0-10.2      |
| Immunotherapy                                     | 0.247     | 2.6       | 0.5-13.2      |
| Specific Treatment                                | 0.017*    |           |               |
| Not treated                                       | Reference |           |               |
| Steroids                                          | 0.436     | 2         | 0.3-11.4      |
| IVIG                                              | 0.538     | 0.4       | 0.03-5.9      |
| Steroids+IVIG                                     | 0.197     | 3.1       | 0.6-17.9      |
| Steroids and/or IVIG+PEX                          | 0.019     | 14        | 1.5-127.2     |
| Relapse                                           | 0.029*    | 4.3       | 1.7-15.7      |
| Months Follow up (log <sub>e</sub> ) <sup>§</sup> | <0.001*   | 0.4       | 0.3-0.6       |

CI = confidence interval; IVIg= intravenous immunoglobulin; log<sub>e</sub> = natural logarithm; OR = odds ratio; PEX= plasma exchange; mRS = modified Rankin Scale.

\* Analysis only included patients with follow-up >3months (N=81). Factors associated with a bad outcome (p<0.1) were included in a multivariable binary logistic regression model and approached by forward stepwise procedure.

<sup>+</sup>Includes decreased level of consciousness and/or severe abnormal behavior. Minor abnormal behavior changes as mild anxiety or insomnia were not included.

<sup>&</sup>Includes IgM (HNK1) and IgG (Glycine, NMDAR, GABA<sub>B</sub>R, DPPX or unknown antigens) antibodies.

<sup>§</sup>Because of a skewed distribution, log-transformation was used for time of follow up (months).



**eTable 2. Antibodies reported in adult patients with OMS**

| Antigen <sup>(ref)</sup>                          | Type of OMS                   | Cancer           | Comment                                                                                                          |
|---------------------------------------------------|-------------------------------|------------------|------------------------------------------------------------------------------------------------------------------|
| <u>Onconeural</u>                                 |                               |                  |                                                                                                                  |
| Ri (NOVA) <sup>10</sup>                           | Paraneoplastic                | Breast           | OMS usually in the setting of a wider brainstem encephalitis. Ri good biomarker of breast and gynecologic cancer |
| HuD, CRMP5, amphiphysin, SOX1, Zic4 <sup>11</sup> | Paraneoplastic                | Lung             | A few cases reported, present series                                                                             |
| Ma2                                               | Paraneoplastic                | NSCLC, gastric   | Present series                                                                                                   |
| <u>Synaptic intracellular</u>                     |                               |                  |                                                                                                                  |
| GAD <sup>12-14</sup>                              | Idiopathic/<br>paraneoplastic | SCLC             | A few cases reported, present series concurrent with HNK1                                                        |
| Adenomatous poliposis coli (APC) <sup>15</sup>    | Idiopathic                    |                  | Two cases reported. Antibodies also found in two PNS patients without OMS                                        |
| <u>Surface antigens</u>                           |                               |                  |                                                                                                                  |
| Neuroleukin <sup>16</sup>                         | Idiopathic                    |                  | Two teenager cases after streptococcal infections                                                                |
| GQ1b <sup>17,18</sup>                             | Idiopathic                    |                  | IgG and IgM antibodies                                                                                           |
| NMDAR <sup>19,20</sup>                            | Idiopathic/paraneoplastic     | Ovarian teratoma | Present series, In two previous cases, opsoclonus was the presenting symptom of NMDAR encephalitis               |
| GABA <sub>A</sub> R <sup>5</sup>                  | Idiopathic                    |                  | Two cases, antibody present only in serum                                                                        |
| GABA <sub>B</sub> R <sup>21</sup>                 | Idiopathic                    |                  | Single case, patient developed limbic encephalitis                                                               |

**eFigure. Peptide sequences corresponding to GluR2 of AMPA receptor immunoprecipitated by the CSF of patients with IgM immunoreactivity against NHK-1**

1 MQKIMHISVL LSPVLWGLIF GVSS**NSIQIG GLFPRGADQE YSAFRVGMVQ FSTSEFRLTP** HIDNLEVANS FAVTNAFCSQ ■ Deamidation (NQ) (+0.98)  
■ Oxidation (M) (+15.99)

81 FSRGVYAIFG FYDKKSVNTI TSPCGTLHVS FITSPFPTDG THPFVIQMRP DLKGALLSLI EYYQWDFKAY LYSDR**GLST**

161 **LQAVLDSAAE K**KWQTAINV GNINNDKKDE TYR**SLFQDLE L**KKERRVILD CERDKVNDIV DQVITIGKHV KGYHYIIANL

241 GFTDGDLLKI QFGGANVSGF QIVDYDDSLV SKFIERWSTL EEKEYPGAHT ATIKYTSALT YDAVQVMTEA FRNLRKQRIE

321 ISRRGNAGDC LANPAVPWGQ GVEIERAL**KQ VQVEGLSGNI K**FQDNGKRIN YTIMINELKT NGRPKIGYWS EVDKMMVTLT

401 ELPSGNDTSG LENKTVVVTT ILESPYVMK KNHEMLEGNE RYEGYCVDLA AEIAKHCGFK Y**LTI**VGDGK YGARDADTK**I**

481 <sup>484</sup>**WNGMVGELVY G**KADIAIAPL TITLVREEVI DFSKPFMSLG ISIMIKKPKQ SKPGVFSFLD PLAYEIMCCI VFAYIGVSVV

561 LFLVSRFSPY EWHTEEFEDG RETQSSSESTN EFGIFNSLWF SLGAFMQQGC DISPRLSGR IVGGVWFFFT LIIISSYTAN

641 LA AFLTVER**M V**SPIESAEDL SKQTEIAYGT **L**DSGSTKEFF RRSKIAVFDK MWTYMR**SAEP S**VFVRTTAEG VARVRKSKGK

721 YAYLESTMN EYIEQRKPCD TMKVGGNLD**S K**GYGIATPKG **S**SLGTPVNL**A V**LKLSEQGV**L D**KLK**N**KNWYD KEGCGAKDSG

801 SKEKTSALS LSNVAGVFYIL VGGLGLAMLV ALIEFCYKSR AEAKRMK**VAK N**PQINPSS**S Q**NSQNFATYK EGYNVYIGIES

881 VKI

| Peptide                   | Uniq | -10lgP | Mass      | ppm    | m/z       | z | RT    | Scan | #Spec | Start | End | PTM       |
|---------------------------|------|--------|-----------|--------|-----------|---|-------|------|-------|-------|-----|-----------|
| K.QTEIAYGTLDSGSTK.E       | N    | 60.43  | 1569.7522 | -106   | 785.8     | 2 | 8.35  | 656  | 2     | 663   | 677 |           |
| K.WNGM(+15.99)VGELVYGK.A  | N    | 57.15  | 1480.7384 | 331.8  | 741.6224  | 2 | 14.2  | 1731 | 2     | 480   | 492 | (M)       |
| R.VGM(+15.99)VQFSTSEFR.L  | N    | 55.58  | 1402.655  | 530.8  | 702.7076  | 2 | 10.37 | 1038 | 1     | 46    | 57  | (M)       |
| K.NPQINPSSSQNSQNFATYK.E   | N    | 54.9   | 2238.03   | 182.6  | 1120.2268 | 2 | 7.95  | 574  | 2     | 851   | 870 |           |
| R.GLSTLQAVLDSAAEK.K       | N    | 54.39  | 1501.7987 | 423.6  | 752.2251  | 2 | 20.79 | 2964 | 1     | 157   | 171 |           |
| R.M(+15.99)VSPIESAEDLSK.Q | N    | 54.34  | 1420.6755 | 312.4  | 711.5673  | 2 | 9.49  | 878  | 4     | 650   | 662 | Oxidation |
| K.GSSLGTPVNLAVLK.L        | Y    | 53.15  | 1354.782  | -505.5 | 678.0553  | 2 | 14.71 | 1823 | 4     | 760   | 773 |           |
| R.VGMVQFSTSEFR.L          | N    | 52.58  | 1386.6602 | 383.5  | 694.6036  | 2 | 13.89 | 1675 | 2     | 46    | 57  |           |
| G.TPVNLAVLK.L             | N    | 51.52  | 953.5909  | 427.7  | 478.0071  | 2 | 10.87 | 1129 | 3     | 765   | 773 |           |
| K.QVQVEGLSGNIK.F          | N    | 51.15  | 1270.6881 | 395.2  | 636.6028  | 2 | 8.64  | 716  | 2     | 350   | 361 |           |
| S.NSIQIGGLFPR.G           | N    | 50.88  | 1200.6615 | -482   | 601.0482  | 2 | 16.08 | 2076 | 4     | 25    | 35  |           |
| R.SAEPVVFVRT              | N    | 48.99  | 990.5134  | 552    | 496.5379  | 2 | 8.81  | 751  | 4     | 697   | 705 |           |
| R.MVSPIESAEDLSK.Q         | N    | 48.78  | 1404.6807 | 135.8  | 703.4431  | 2 | 11.88 | 1312 | 2     | 650   | 662 |           |
| R.GADQEYSAFR.V            | N    | 48.66  | 1142.4993 | 294.8  | 572.4256  | 2 | 8.16  | 619  | 1     | 36    | 45  |           |
| K.GYGIATPK.G              | N    | 46.73  | 805.4333  | 1126.7 | 404.1788  | 2 | 7.88  | 559  | 3     | 752   | 759 |           |
| K.LSEQGVLDKLN             | N    | 41.36  | 1228.7026 | 188.1  | 615.4743  | 2 | 9.52  | 884  | 2     | 774   | 784 |           |
| K.LTIVGDGK.Y              | N    | 38.89  | 801.4596  | 678.1  | 402.0095  | 2 | 8.06  | 597  | 3     | 463   | 470 |           |
| S.N(+.99)SIQIGGLFPR.G     | N    | 35.7   | 1201.6455 | 855.2  | 602.3447  | 2 | 18.43 | 2515 | 1     | 25    | 35  | (NQ)      |
| R.SLFQDLELKK.E            | N    | 28.04  | 1219.6812 | -251.1 | 407.4653  | 3 | 13.69 | 1637 | 1     | 194   | 203 |           |
| K.EFFRR.S                 | N    | 16.3   | 753.3922  | 620.8  | 377.9378  | 2 | 7.87  | 556  | 1     | 678   | 682 |           |
| <b>total 20 peptides</b>  |      |        |           |        |           |   |       |      |       |       |     |           |
